# Supplementary material for: Can Molecular Motors Drive Distance Measurements in Injured Neurons?
Source: PubMed Central journal article supplement (PMC2718615; doi:10.1371/journal.pcbi.1000477), 2009-08-21

**Figure S4****A**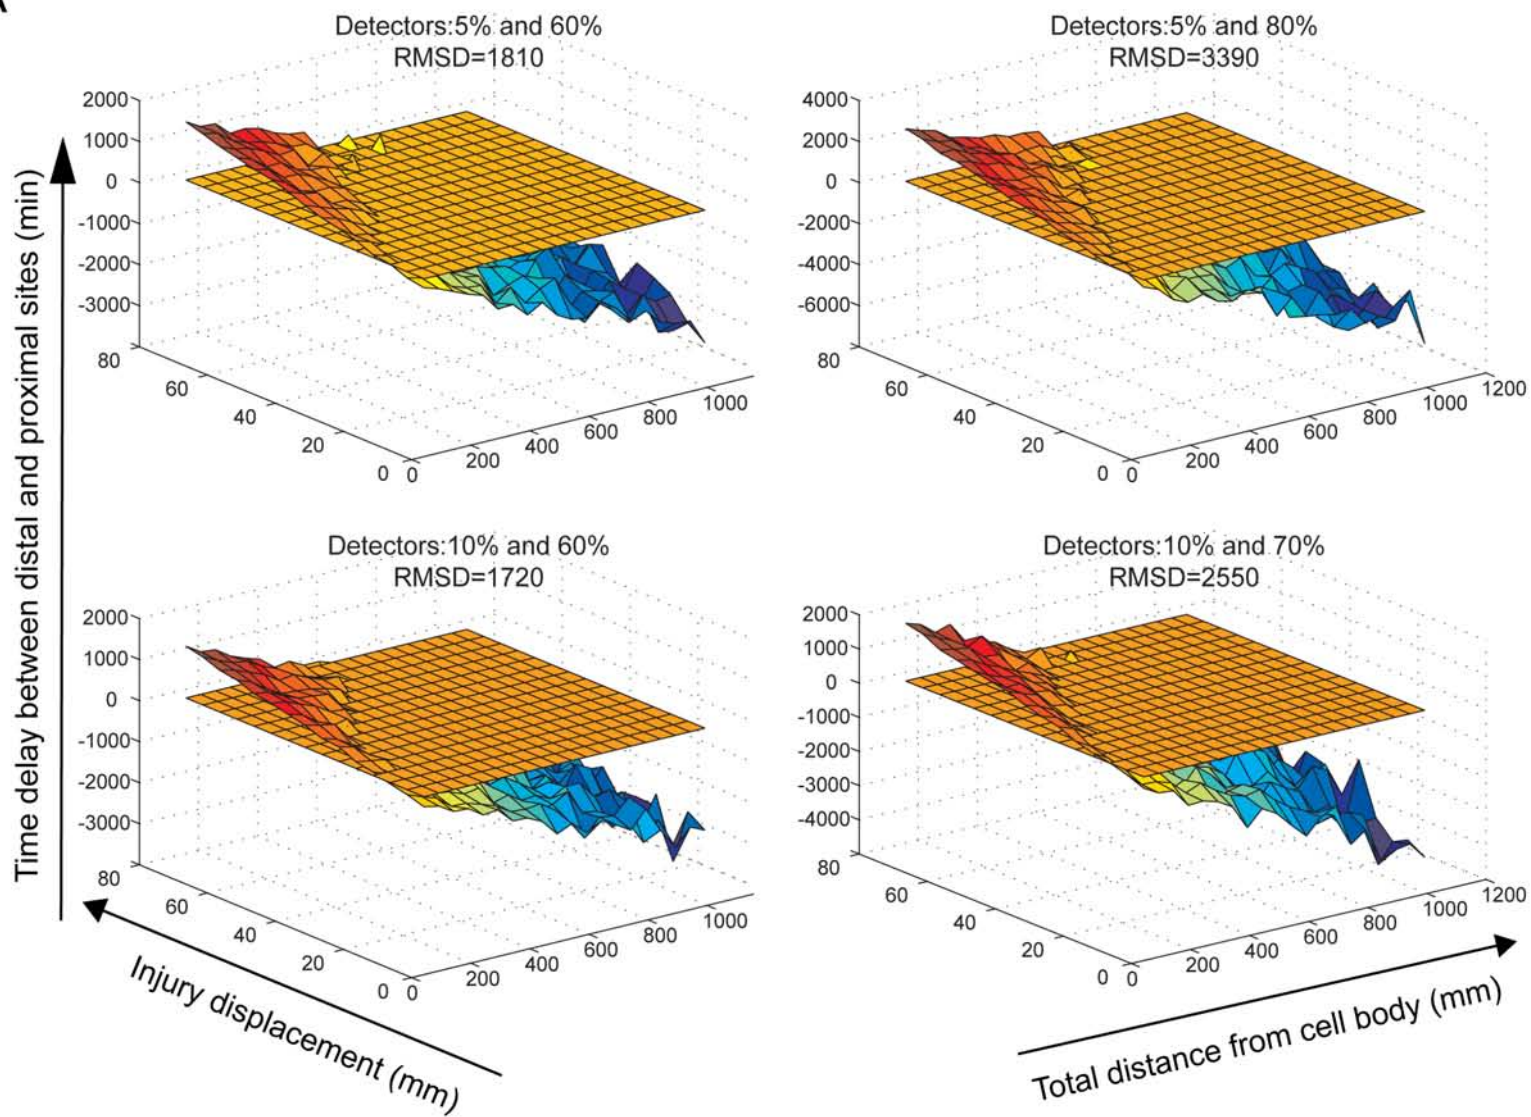**B**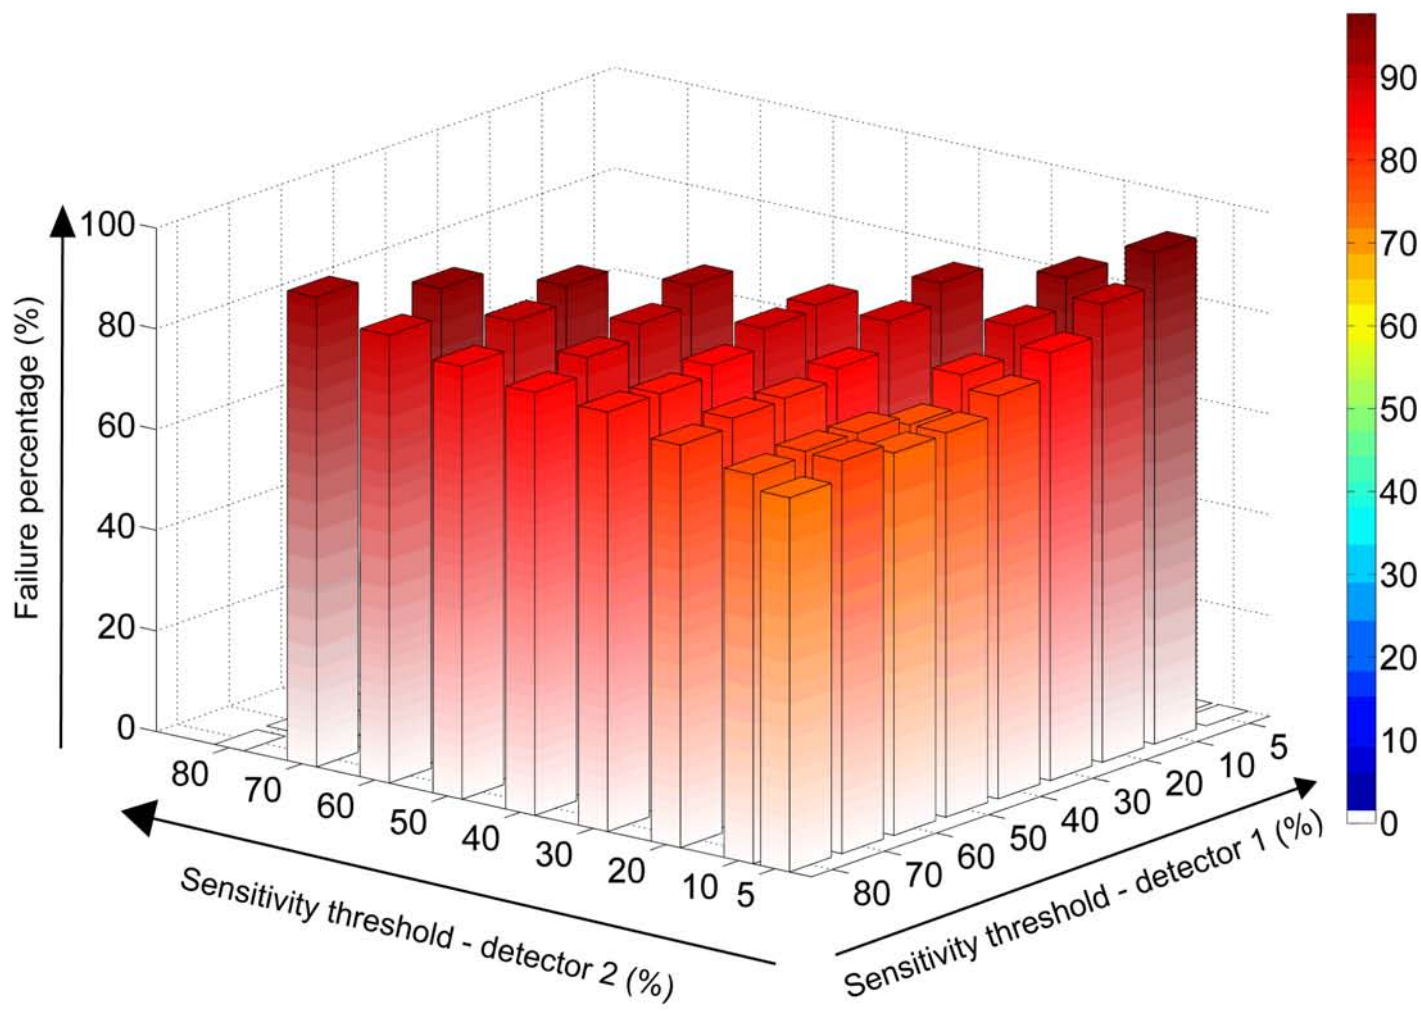

Supplement: pcbi.1000477.s004.pdf [file pcbi.1000477.s004.pdf]
